# Supplementary material for: Conserved regulation of neurodevelopmental processes and behavior by FoxP in Drosophila
Source: PLoS One. 2019 Feb 12;14(2):e0211652. doi: 10.1371/journal.pone.0211652 (PMC6372147; doi:10.1371/journal.pone.0211652)
Supplement: S11 Table — Dlg1-labelled post-synaptic area in μm2. (XLSX) [file pone.0211652.s020.xlsx]

## Sheet: Table S11
	elav-GAL4			Mef2-GAL4
	Area in μm2 (Dlg1)			Area in μm2 (Dlg1)
n	Control	FoxP-RNAi1	FoxP-RNAi2	Control	FoxP-RNAi1	FoxP-RNAi2
1	313.798	361.856	395.989	348	220	232
2	293.818	406.25	438.989	324	306	279
3	309.927	387.726	363.625	272	293	232
4	310.26	438.51	364.217	288	240	208
5	277.946	369.973	336.11	257	298	283
6	222.887	424.107	326.432	297	414	361
7	318.606	538.35	276.709	268	316	299
8	253.565	488.482	330.678	217	317	235
9	385.77	346.683	311.321	307	299	306
10	333.196	433.203	289.468	169	276	309
11	313.861	363.458	343.623	369	277	323
12	236.394	393.179	354.717	249	274	314
13	299.523	369.327	372.928	255	304	307
14	272.151	481.676	407.29	340	202	294
15	335.069	353.197	439.155	206	259	261
16	214.562	364.853	341.792	278	262	262
17	317.336	464.172	189.128	257	303	257
18	303.579	346.204	377.278	351	318	208
19	463.294	401.504	346.696	277	318	208
20	403.46	378.464	342.528	229	226	350
21	454.984	326.598	555.16	308	309	232
22	314.244	487.498	367.198	259	186	220
23	417.037	335.866	453.185	247	215	307
24	351.413	500.5	354.42	270	306	305
25	388.37	375.69	425.824	269	309	198
26	354.855	266.541	483.999	225	334	231
27	443.434	437.213	441.055	217	365	183
28	378.266	426.384	298.51	204	345	276
29	385.062	481.096	550.142	272	343	269
30	401.143	346.467	698.72	313	295	260
31	392.014	506.824	389.002	176	300	320
32	426.985	398.608	410.687		279
33	420.313	206.665	589.26		279
34	325.332	406.187	448.991
35	369.293	457.405	453.206
36	409.111	357.473	562.06
37	408.499	627.171	450.122
38	454.01	425.845
39	454.585	513.667
40	425.052	505.839
41	365.669	491.676
42	324.415	519.224
43		661.007
44		584.724
45		514.408
46		481.423
47		449.303
48		302.243
49		445.943
n	42	49	37	31	33	31
AVG	353.407	427.565	402.168	268.323	290.515	268.677
SD	66.4705	87.1289	98.2081	49.8273	47.402	46.4158
SEM	10.2566	12.447	16.1453	8.94925	8.25162	8.33652
